1           **Ultra-high field imaging reveals increased whole**  
2           **brain connectivity underpins cognitive strategies**  
3           **that attenuate pain**

4           Enrico Schulz<sup>1,2</sup>, Anne Stankewitz<sup>2</sup>, Anderson M Winkler<sup>1</sup>, Stephanie Irving<sup>2</sup>, Viktor  
5           Witkovsky<sup>3</sup>, Irene Tracey<sup>1</sup>

6           <sup>1</sup> Wellcome Centre for Integrative Neuroimaging, Nuffield Department of Clinical  
7           Neurosciences, University of Oxford, Oxford, UK

8           <sup>2</sup>Department of Neurology, Ludwig-Maximilians-Universität München, 81377 Munich,  
9           Germany

10          <sup>3</sup>Department of Theoretical Methods, Institute of Measurement Science, Slovak Academy of  
11          Sciences, 841 04 Bratislava, Slovak Republic

12          Corresponding author:  
13          Enrico Schulz  
14          Neurologische Klinik und Poliklinik  
15          Marchioninstr. 15  
16          81377 München  
17          Email: [eschulz@med.lmu.de](mailto:eschulz@med.lmu.de)

## 18 **ABSTRACT**

19 The perception of pain activates a number of brain regions and processes that are involved  
20 in its sensory, emotional, cognitive, and affective aspects; all of which require a flexible  
21 functional connectivity between local and distant brain regions. Here, we investigate how the  
22 attenuation of pain with cognitive interventions affects the strength of these connections by  
23 pursuing a whole brain approach in order to assess every cortical connection that  
24 contributes to successful pain relief.

25 While receiving 40s trials of tonic cold pain, 22 healthy participants were asked to utilise  
26 three different pain attenuation strategies: (a) non-imaginal distraction by counting  
27 backwards in steps of seven, (b) imaginal distraction by imagining a safe place, and (c)  
28 cognitive reappraisal. During a 7T fMRI recording, participants were asked to rate their pain  
29 after each single trial. We related the trial-by-trial variability of the attenuation performance to  
30 the trial-by-trial functional connectivity of the cortical data. Across all three conditions, we  
31 found that a higher performance of pain attenuation was predominantly associated with  
32 higher functional connectivity between all regions.

33 Of note, we observed an association between low pain and high connectivity for regions that  
34 belong to the core areas of pain processing, i.e. the insular and cingulate cortices. For one of  
35 the cognitive strategies (safe place), the performance success of pain attenuation was  
36 explained by diffusion tensor imaging metrics of increased white matter integrity.

37 Therefore, successful cognitive interventions to ameliorate pain and improve clinical  
38 outcomes would require the strengthening of cortical connections.

## 39 **SHORT TITLE**

40 Cognitive Strategies Increase Brain Connectivity to Attenuate Pain.

## 41 INTRODUCTION

42 An increased perception of pain is generally associated with increased cortical activity; this  
43 has been demonstrated for a number of brain regions and processes involved in sensory,  
44 emotional, cognitive, and affective aspects of pain (1,2). Given the threatening nature of pain,  
45 the information processed from these different aspects have to be integrated and assessed  
46 to compute an appropriate decision and subsequent action (3). To do so, pain-processing  
47 brain regions are required to exchange information, which entails increased functional  
48 connectivity between relevant cortical and subcortical regions (4,5). Conversely, less is  
49 known about connectivity changes during decreased pain, although many studies highlight  
50 decreased neuronal activity with some studies highlighting selective changes in coupling  
51 between brain regions (6).

52 Such studies have largely investigated the network activity of the pain system by quantifying  
53 the covariation of the fluctuating blood-oxygen-level dependent (BOLD) activity. Changes of  
54 this covariation of cortical signals have then been related to conditions that represent  
55 different levels of pain experience. Villemure & Bushnell (2009) and Ploner et al. (2011), for  
56 example, investigated the influence of different levels of emotion and attention on pain-  
57 related cortical connectivity (5,6). Both studies observed an increase of connectivity for the  
58 conditions that increased the intensity of pain; i.e. increased attention towards painful stimuli  
59 was associated with more negative emotions.

60 A further study found that a change in pre-stimulus cortical connectivity patterns from the  
61 anterior insula to the periaqueductal grey (PAG), which is part of the descending pain  
62 modulatory system (7), determined whether a subsequent nociceptive stimulus was  
63 perceived as painful or not (8). Supporting that observation, other investigations have  
64 similarly reported increased functional connectivity between the PAG and the perigenual  
65 anterior cingulate cortex (pACC) for conditions associated with decreased pain intensity  
66 perception (placebo, shift of attention) (9-11). A recent study even showed that the structural  
67 integrity, as measured using diffusion tensor imaging (DTI) of white matter tracts between  
68 brain regions coupled with this descending pain modulatory system, was significantly  
69 correlated to the effectiveness of transcranial direct current stimulation brain stimulation in  
70 alleviating pain (12).

71 Therefore, all studies to date point to the relevance of connectivity patterns in pain  
72 modulation; yet, excluding an increased connectivity to the descending pain modulatory  
73 system's PAG, the precise nature of cortical connectivity during decreased pain is unclear

74 and limited. Using ultra-high field functional magnetic resonance imaging (fMRI) to provide  
75 enhanced signal-to-noise ratio (SNR) to facilitate single-trial analysis, we explored the  
76 functional connections that contribute to the attenuation of pain by means of three different  
77 cognitive interventions: (a) a non-imaginal distraction by counting backwards in steps of  
78 seven; (b) an imaginal distraction by imagining a safe place; and (c) reinterpretation of the  
79 pain valence (cognitive reappraisal). These cognitive strategies are hypothesised to be  
80 represented in the brain by a complex cerebral network that connects a number of brain  
81 regions, where:

82 (1) The effective use of a cognitive strategy that is successful for pain attenuation results in  
83 an increase of functional connectivity between task-related brain regions.

84 (2) Decreased connectivity is expected between cortical areas that are involved in the  
85 processing and encoding of pain intensity, e.g. sub-regions of the insular cortex, the  
86 cingulate cortex, somatosensory cortices, and PAG.

87 (3) Increased connectivity is hypothesised for the descending pain control system,  
88 particularly for the connection between the pACC and the PAG.

89 (4) Divisions of the insular cortex and their connections to frontal and somatosensory regions  
90 play a key role through their high relevance in integrating sensory information.

91 Unlike previous research paradigms, the present experimental procedure aims to  
92 approximate clinical treatment procedures by using a novel pain stimulation approach that  
93 produces longer lasting pain experiences. Healthy participants were asked to utilise  
94 cognitive strategies in order to attenuate the experience of pain during 40s of cold  
95 stimulation. We pursued a whole-brain parcellation approach (13) in order to assess every  
96 cortical connection that contributes to successful pain relief.

## 97 RESULTS

98 Overall, we found an increase of connectivity during pain attenuation: trials rated as low pain  
99 as a consequence of utilising a cognitive strategy had stronger connectivity compared with  
100 trials of the unmodulated pain condition that were rated as high pain. Therefore trials with  
101 high pain are coupled with low connectivity, and trials with low pain are coupled with high  
102 connectivity.

103 We pursued a whole-brain approach by subdividing the cortex into 180 regions per  
104 hemisphere plus 21 subcortical regions (13) and related cortical connectivity to pain ratings  
105 at single trial level. This approach was facilitated by an increased SNR as a result of ultra-  
106 high field recording, as well as by a more reliable assessment of single trial data from longer  
107 lasting painful stimulation and an extended task application. For each of the three conditions,  
108 we merged the 11 trials of the cognitive interventions with the 11 unmodulated pain trials,  
109 which has two major advantages:

110 (i) First, it takes the within-subjects variable performance of the pain attenuation attempts  
111 into account; e.g. a more successful attempt to attenuate pain is considered to cause a  
112 different cortical connectivity than a less successful attempt.

113 (ii) Second, we also take into account the more natural fluctuation of the unmodulated pain  
114 trials.

115 The findings are represented in confusion matrices, depicting the pain intensity-related  
116 connectivity between all brain regions. Positive relationships (*red*) show connectivities that  
117 were increased in particularly effective trials (performance encoding). For all tasks, we  
118 confirmed our first hypothesis by showing that an increased connectivity of *task-processing*  
119 brain regions is related to particularly successful attempts to attenuate pain. However,  
120 contrary to our second hypothesis, we found increased brain activity for successful single  
121 trials also in *pain-processing* regions. The increased connectivities are therefore suggested  
122 to initiate mechanisms of cortical activity suppression, such as shown in our previous  
123 publication (14). Negative relationships (*blue*) represent cortical connections that are  
124 disrupted in successful trials to attenuate pain. Disruptions were hypothesised to occur for  
125 the core regions of pain processing, such as for the various subregions of the insular,  
126 cingulate, and somatosensory cortices. However, we found that these regions predominantly  
127 showed increased connectivity during successful trials of pain attenuation (see above).

128 (1) *Counting*. We aimed to detect patterns of connectivity changes that are related to  
129 successful trials during counting. The attenuation of pain during counting is predominantly  
130 related to an increase of cortical connectivity in several brain regions, with the exception of  
131 decreased connections involving the right temporo-parieto-occipital junction (Figure 1A). The  
132 detailed matrix of statistical results can be found in the supplementary material  
133 (Supplementary Spreadsheet 1).

134 We found that some regions show a particularly strong connectivity: the right insula, the left  
135 and right temporal cortices, the left parietal cortex, as well as higher order visual regions in  
136 occipito-temporal areas. The best connected area is the right middle insula (Figure 1C,  
137  $p < 0.05$ , PALM corrected). Indeed, some prominent connectivity patterns are noticeable: pain  
138 attenuation-related connections from the right insular sub-regions are always connected to  
139 insular sub-regions from the contralateral hemisphere, but not to other ipsilateral insular  
140 regions. In addition, areas in the left medial wall of the parietal cortex (Brodmann area 7) are  
141 functionally connected to a right posterior cortical region that stretches from higher order  
142 visual areas (lateral occipital cortex) to the posterior medial temporal cortex. The homologue  
143 left occipito-temporal region is functionally connected to the right inferior parietal lobe  
144 (subregions PFt and PFop). Regions in the left superior and middle temporal cortex are  
145 strongly connected with several sections of the insular cortex. Extended regions in the left  
146 superior parietal cortex (Brodmann area 5) and the posterior cingulate cortex are functionally  
147 connected with the right middle insular cortex (Figure 1C, Supplementary Spreadsheet 1).

148 Measures of structural connectivity (DTI fibre tracking) did not explain interindividual  
149 differences in modulating task-related functional connections in the counting condition.

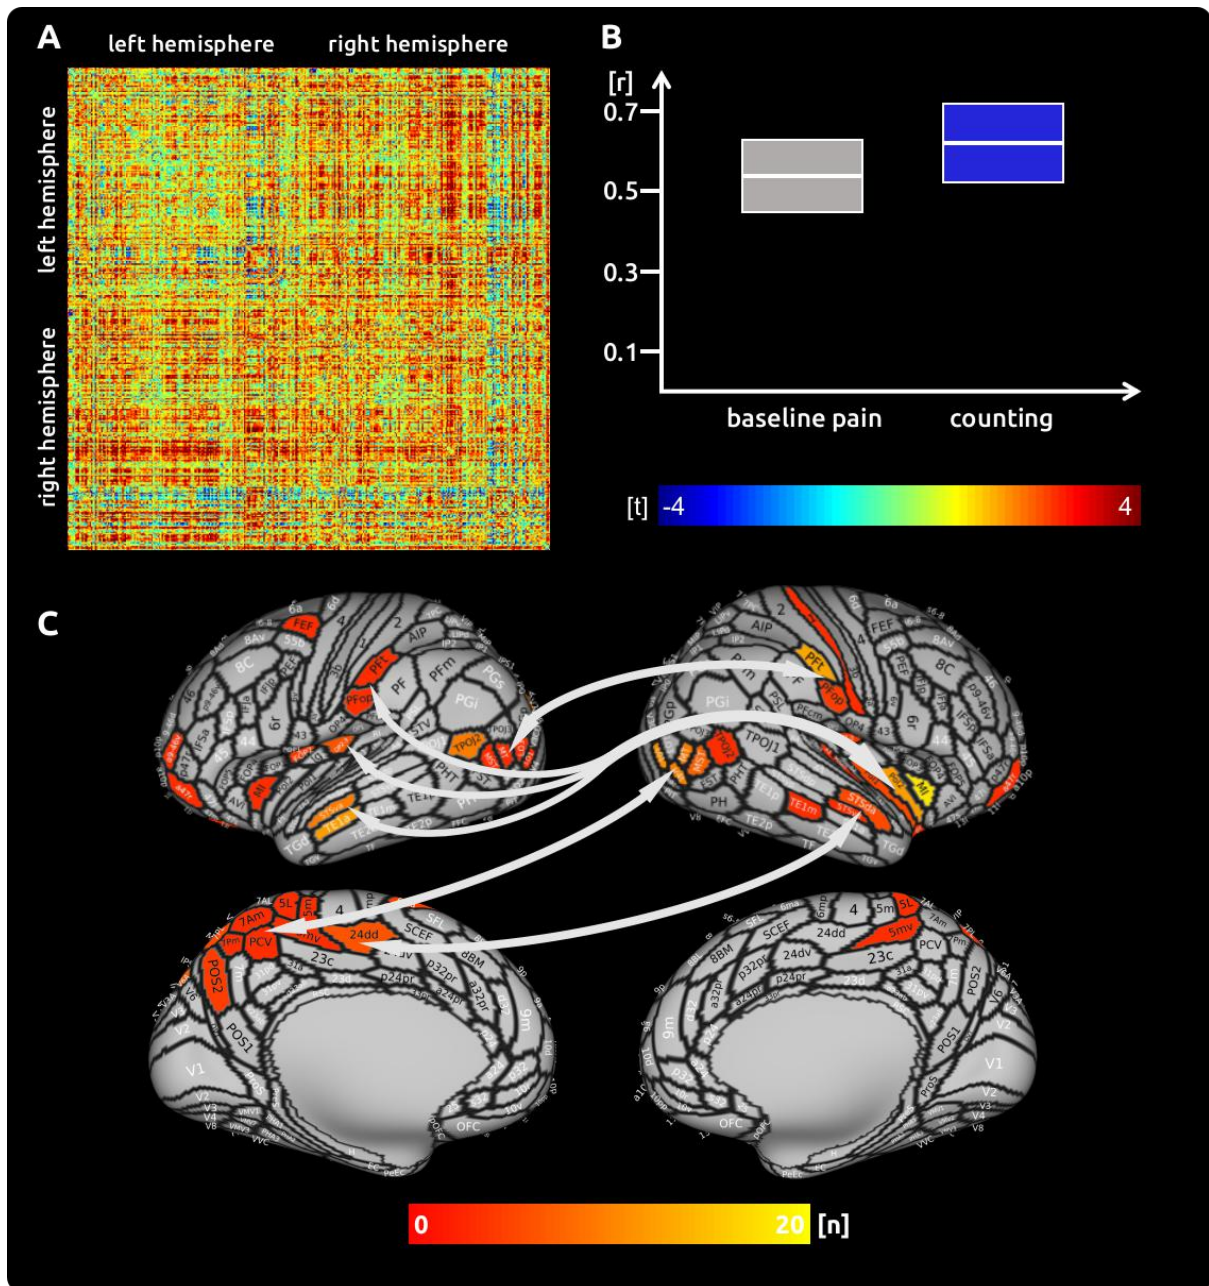

150 **Figure 1.** Counting: (A) the confusion matrix shows the statistical results. The values are mirrored  
151 along the principal diagonal of the matrix. A single red dot represents the varying connectivity  
152 between two specific brain regions and indicates that a stronger cortical connectivity in a single trial is  
153 related to a decrease in pain perception (performance encoding). These findings are the result of the  
154 higher connectivity in the trials of the counting task compared to unmodulated pain trials. (B) data  
155 from the confusion matrix averaged across all subjects, connections and trials (for illustration  
156 purposes only). (C) Depiction of the cortical regions as defined by the Glasser parcellation. The right  
157 middle insular cortex has the most connections where connectivity changes are shown to significantly  
158 modulate pain intensity.

159 (2) *Safe place*. During the imagining condition, we found an increase of connectivity across  
160 all cortical regions when compared to the unmodulated pain condition (Figure 2A). The  
161 detailed matrix of statistical results can be found in the supplementary material  
162 (Supplementary Spreadsheet 2). There is no negative relationship between single trial

163 connectivity and pain intensity. Besides the well-connected right insular cortex, we observed  
164 attenuation-related connectivity changes in right parietal (BA 5) and left superior parietal  
165 cortices (BA 7). Further well-connected areas include a frontal language area (BA 55b) as  
166 well as motor and premotor areas. The right posterior insular cortex is connected to the left  
167 parietal cortex (BA 7). The right precentral areas are functionally interconnected with  
168 prefrontal and orbitofrontal areas, the right parietal cortex (BA 5), and the left superior  
169 parietal cortex (BA 7). The right “belt” regions are functionally connected to prefrontal and  
170 orbitofrontal areas (Figure 3C).

171 For the safe place condition only, we found that the strength of fibre connections mediates  
172 the strength of the functional connectivity. Some subjects made use of their better structural  
173 connectivity, as measured by the number of streamlines obtained from fibre tracking. Strong  
174 structural connectivities are related to a better ability to modulate the functional connectivity  
175 in order to attenuate pain. This applies especially to connections between frontal regions  
176 (IFSp and Brodmann area 8C) and the secondary somatosensory cortex (SII). Further  
177 functional connections that are supported by the strength of fibre connections projected to  
178 memory-related areas (presubiculum of the hippocampus and entorhinal cortex).



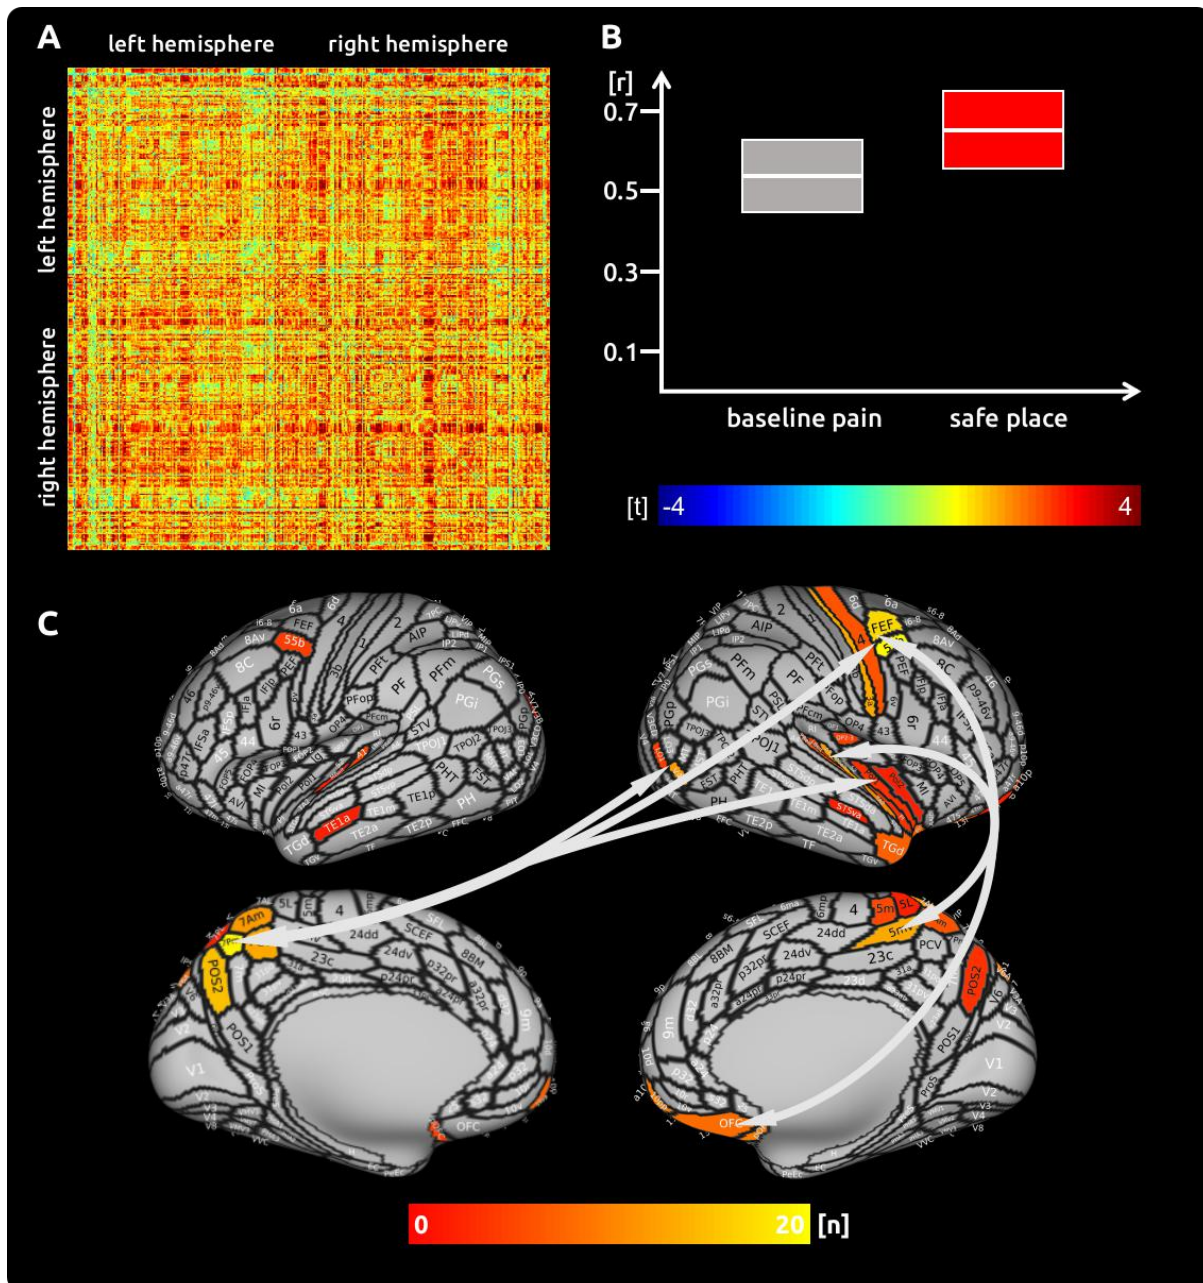

179 **Figure 2.** Safe place: (A) the confusion matrix shows the statistical results. The values are mirrored  
180 along the principal diagonal of the matrix. A single red dot represents the varying connectivity  
181 between two specific brain regions and indicates that a stronger cortical connectivity in a single trial is  
182 related to a decrease in pain perception (performance encoding). These findings are the result of the  
183 higher connectivity in the trials of the imagination task compared to unmodulated pain trials. (B) data  
184 from the confusion matrix averaged across all subjects, connections and trials (for illustration  
185 purposes only). (C) Depiction of the cortical regions as defined by the Glasser parcellation. The left  
186 parietal cortex and right premotor areas have the most connections where connectivity changes are  
187 shown to significantly modulate pain intensity.

188 (3) *Reappraisal*. While executing cognitive reappraisal we found a pain attenuation-related  
189 increase of functional connectivity compared to the unmodulated pain condition across the  
190 entire cortex (Figure 3A). The detailed matrix of statistical results can be found in the  
191 supplementary material (Supplementary Spreadsheet 3). Decreased functional connectivity

192 has not been observed. Connections that included frontal premotor and insular sub-regions  
193 contributed to a decrease of pain (Figure 3C). However, the main hub of connectivity was  
194 located in the medial parieto-occipital cortex. Besides other regions, the area V6A is  
195 interconnected with several insular and frontal premotor areas, some of which control eye  
196 movements. The structural characteristics between cortical regions did not contribute to an  
197 enhanced functional connectivity for reappraisal.

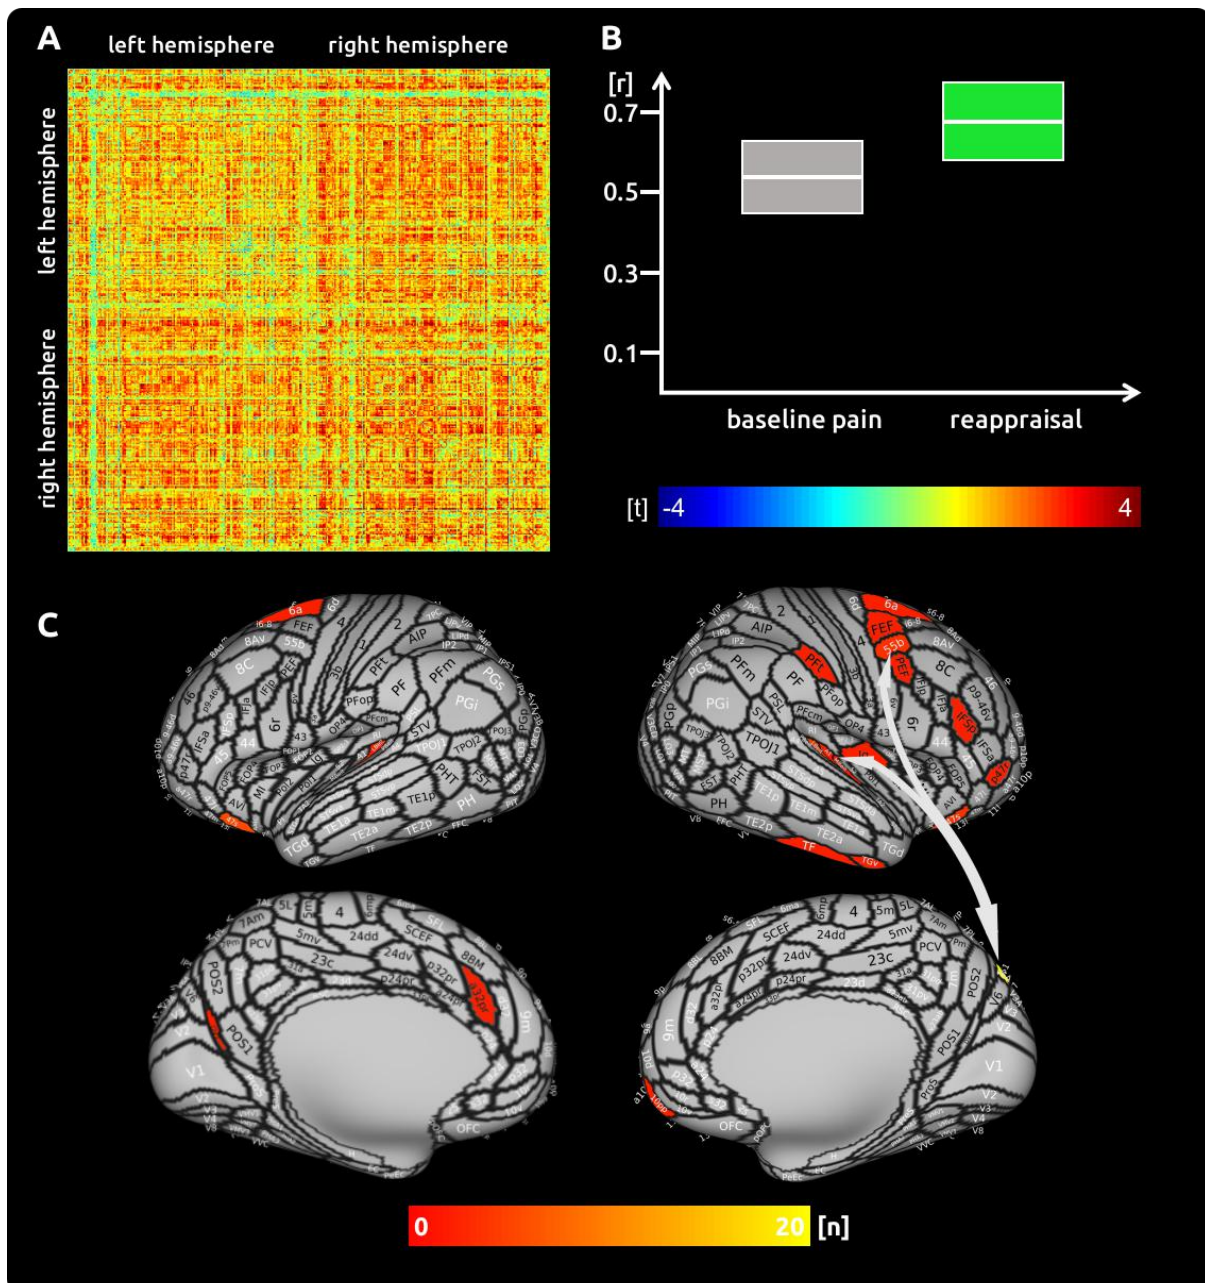

198 **Figure 3.** Reappraisal: (A) the confusion matrix shows the statistical results. The values are mirrored  
199 along the principal diagonal of the matrix. A single red dot represents the varying connectivity  
200 between two specific brain regions and indicates that a stronger cortical connectivity in a single trial is  
201 related to a decrease in pain perception (performance encoding). These findings are the result of the  
202 higher connectivity in the trials of the reappraisal task compared to unmodulated pain trials. (B) data  
203 from the confusion matrix averaged across all subjects, connections and trials (for illustration

204 purposes only). (C) Depiction of the cortical regions as defined by the Glasser parcellation. The region  
205 V6A in the parieto-occipital cortex has the most connections where connectivity changes are shown to  
206 significantly modulate pain intensity.

207 (4) *Conjunction analysis*. We did not find any pain-related connectivity changes present in all  
208 three conditions.

## 209 DISCUSSION

210 Here, we aimed to explore how functional and structural connections in the brain contribute  
211 to executing cognitive tasks that attenuate pain (14,15) by utilising a single-trial analysis  
212 approach afforded by ultra-high field imaging. Across three experimental conditions, 20  
213 healthy participants were asked to (a) count backwards, (b) imagine a safe and happy place,  
214 and (c) apply a cognitive reappraisal strategy. All strategies resulted in significant pain relief  
215 when compared to the unmodulated pain condition. We applied a whole-brain approach on  
216 the basis of brain parcellation definitions (13) and explored connectivity patterns during  
217 single attempts to attenuate pain. We further explored whether functional connections are  
218 facilitated by axonal fibre connections, measured with DTI.

219 Across all cognitive interventions, our results revealed an *increase* of connectivity pattern  
220 throughout the cerebral cortex for all three interventions; a higher functional connectivity was  
221 related to particularly successful single attempts to attenuate pain. Therefore, the  
222 unmodulated pain trials - which were experienced as considerably more painful - exhibited a  
223 lower functional connectivity compared to pain trials during cognitive tasks. This finding has  
224 two implications:

225 *First*, increased connectivity in *task-related* regions is necessary to successfully execute the  
226 respective cognitive tasks.

227 *Second*, contrary to our hypothesis and previous findings, increased connectivity with *pain-*  
228 *related* brain regions (e.g. insular cortex, ACC, or somatosensory cortices) is related to  
229 successful attenuation trials with decreased intensities of pain. These increased  
230 connectivities are required to actively suppress the *activity* in regions known to contribute to  
231 pain processing (16) and are further modulated in the respective task (14). The neuronal  
232 activity of these pain-related brain regions are most likely to be actively inhibited, such as by  
233 GABAergic neurons in the insular cortex (17,18), and thus contribute to a lower pain  
234 experience by impeding the processing of pain in this region.

235 *Counting*. For the cognitively-demanding counting task, we found a number of well-  
236 connected regions that contribute directly or indirectly to the reduction of pain intensity.  
237 These regions are located in the parietal and occipito-temporal cortices, overlapping with the  
238 modulation of BOLD activity during counting tasks (14,19). Increased connectivity during  
239 counting occurred for connections with pain processing areas, such as divisions of the  
240 insular cortex, the posterior cingulate cortex, and the primary and the secondary  
241 somatosensory cortices. The highest number of connections to other brain regions during  
242 the counting task was found for the right middle insular cortex. Although our analyses do not

243 allow for any assumptions on directionality, the many pain-related functional connectivities  
244 between left parietal areas (high BOLD activity) and right insular sub-regions (low BOLD  
245 activity) suggest a suppression effect on the insular areas (see (14)).

246 Disrupted connectivities during the counting task were observed for the right temporo-  
247 parieto-occipital junction (TPJ) to the right posterior insula, as well as to temporo-occipital  
248 areas. Given the involvement of the TPJ in attentional processing (20,21), elevated focus on  
249 the task may have decreased the transmission during task execution but increased the  
250 transmission for the unmodulated pain trials (14). The counting trials are further suggested to  
251 require a visual support by imagining the numbers in space (22). Visual areas in the *left*  
252 occipito-temporal cortex connect to and suppress right parietal opercular areas. We also  
253 found visual support located in the *right* occipito-temporal cortex that is functionally  
254 connected to parietal areas, which in turn suppress insular activity.

255 *Safe place*. Similar to the counting condition, we found regions in the left and right parieto-  
256 occipital cortex to be highly connected to other brain regions. Notably, the parietal cortex is  
257 functionally connected without a rise of regional BOLD activity (see(14)). This effect shows  
258 that brain regions can play an important role in pain processing via an exchange of  
259 information, where low-scale modulations of cortical activity are not causing large metabolic  
260 effects. Moreover, the strong connectivity pattern between left parietal and right insular  
261 regions suggests an active suppression of insular regions initiated by the parietal cortex (as  
262 reflected by *increased* functional connectivity between these regions).

263 We found well-connected regions in the precentral gyrus: area 55b has been shown to be  
264 active during listening to stories in the language task of the Human Connectome Project  
265 dataset (13). Therefore, the increased connectivity in area 55b may be related to the  
266 narrative aspects of the imaginary task in which the participants may recall being actively  
267 involved in an event of pleasure and happiness. The premotor and motor areas in the  
268 precentral gyrus in particular may reflect the motor aspect of the imagination task (23,24).  
269 They are connected to orbitofrontal areas which are thought to initiate top-down pain  
270 suppression of ascending pathways (9,25).

271 For the safe place condition only, we found that the ability to functionally utilise certain  
272 pathways is mediated by the strength of axonal fibre connections. These anatomical  
273 characteristics are suggested to help the participants with stronger fibre connections to  
274 better attenuate pain. This applies especially to connections between middle frontal regions  
275 (IFSp and 8C) to the secondary somatosensory cortex (SII). Further functional connections

276 that are supported by the strength of fibre connections project from the frontal cortex to  
277 memory-related limbic areas (presubiculum of the hippocampus, entorhinal cortex), which  
278 could facilitate memory retrieval for the imagination of pleasant scenes (26-30).

279 *Reappraisal.* The best connected region during cognitive reappraisal is located in the higher  
280 order visual cortex, area V6A, which is mainly interconnected with insular and frontal  
281 premotor areas. Area V6A is known to contribute to spatial object localisation; a study on  
282 monkeys shows that V6A cells are active when executing reaching movements independent  
283 of visual or oculomotor processing (31). These cells have also been found to encode body-  
284 centred spatial localisation (32). The use of V6A and its connection to other brain areas  
285 could help the participants - as required by the task - to focus on the stimulated body site.  
286 However, this focussing should be considered as a prerequisite and does not necessarily  
287 imply any pain attenuation. Yet the focus on pain has been shown to increase pain  
288 perception and pain-related cortical activity (33-35). Therefore, as found in the present  
289 investigation, the connections from the inferior frontal cortex, the anterior cingulate cortex,  
290 the frontal pole, and orbitofrontal cortex are additionally required to utilise cognitive  
291 reappraisal (36,37) in order to ultimately attenuate the experience of pain (14).

292 *Analysing pain-related functional connections in the human brain.* Unlike previous studies,  
293 we almost exclusively found a lower functional connectivity for trials and conditions of higher  
294 pain intensity, which could be caused by differences in experimental design and analysis  
295 strategies.

296 In neuroimaging, functional connectivity is considered a joint phase-locked oscillation of  
297 spatially distant cortical regions. Task-based connectivity analyses predominantly utilise a  
298 seed-based approach to determine the functional connectivity between a predefined seed  
299 region and one or more distant brain regions; such analyses can only take into account the  
300 short period during which a task is being executed. However, exact connectivity measures  
301 between brain regions would require a sufficient number of samples to quantify the joint in-  
302 phase increases and decreases of the BOLD response. In order to estimate a reliable  
303 measure of connectivity, we applied a relatively long time window (~30s, 15 data points) for  
304 inflicting pain, for executing the cognitive task, and for reliably determining the connectivity of  
305 a single trial. The strong focus on extended stimulation makes the present investigation  
306 difficult to compare with previous work. For instance, a study by Villemure & Bushnell (5)  
307 sampled every 4s but analysed a relatively short time window of 5s painful stimulation to  
308 investigate connectivity. Another study analysed a single data point (3s analysis window,  
309 sampling of 3s) before nociceptive laser stimulation to predict pain intensity (8). A further  
310 study used 3 data points for connectivity analyses of an experiment in which the pain

311 stimulations lasted 10s (4). A repeated stimulation at the frequency of the recording  
312 (application of 5 brief laser pain stimuli every 3s sampled with a TR of 3s) makes it difficult to  
313 separate the connectivity aspects from the general increase of the BOLD response (6).

314 Therefore, the different methodological approaches might have caused our findings to  
315 contradict previous studies, in which high levels of pain were shown to increase cortical  
316 connectivity between pain processing brain regions (4-6). Villemure & Bushnell (5) and  
317 Ploner et al. (6) found a stronger connectivity in pain processing brain regions for conditions  
318 that increased the intensity of pain (i.e. increased attention, more negative emotion). The  
319 connectivity of the inferior frontal cortex for an emotional condition, and the connectivity of  
320 the superior parietal cortex, and the entorhinal cortex for the attentional condition were found  
321 to modulate cortical processes (5).

322 Other studies investigated the connectivity in the descending pain control system and  
323 observed an increase of connectivity between the perigenual ACC and the PAG during a  
324 pain-relieving placebo intervention (9). Given the lower signal-to-noise ratio in mid-brain  
325 areas, this finding could not be replicated in any of the present conditions with the current  
326 whole-brain approach and a strict correction for multiple comparisons (38). By lowering the  
327 statistical threshold, we found a modulation of pain intensity-dependent functional  
328 connectivity from the PAG to regions that contribute to pain processing, such as the anterior  
329 ventral insula ( $t > 2$ ), the midcingulate cortex ( $t > 2.5$ ), and the nucleus accumbens ( $t > 3$ ),  
330 indicating a stronger connectivity for the pain condition with cognitive modulation.

331 Further studies directly investigated the functional connectivity in the brain in response to  
332 different intensities of pain stimuli. Sprenger et al. (2015) found an increase of connectivity in  
333 subcortical nuclei for the higher of two pain conditions. Similarly, an increased connectivity  
334 has been found in response to cold pain stimulation. The authors reported a significant  
335 correlation across the entire time course of the experiment between predefined regions that  
336 are known to be involved in the processing of pain (39). As discussed above, our data  
337 showed that the decrease of pain is predominantly related to an increase of cortical  
338 connectivity in both *pain-related* regions (e.g. subregions of the insular cortex) and *task-*  
339 *related* brain regions (subregions in the frontal and parietal cortex).

340 **Summary.** The present investigation resembles a clinical intervention in which a pain patient  
341 would be taught to utilise cognitive strategies to attenuate pain. Here, we investigated which  
342 cortical connection contributes to particularly successful trials to attenuate pain. In contrast  
343 to previous research, we revealed an increased connectivity for the single attempts that

344 resulted in lower percepts of pain. This applies to the classical pain processing regions (e.g.  
345 insula, cingulate cortex, and somatosensory cortices). Although we found different  
346 connectivity patterns for all interventions, the general mechanism was universally valid. The  
347 present findings are suggested to open a new window in the understanding of cortical  
348 processes that are associated with high levels of long-lasting tonic or chronic pain. As a  
349 consequence, clinical treatments that would aim to decrease cortico-cortical connections are  
350 suggested to have a rather detrimental effect on pain relief in patients suffering from chronic  
351 pain. Future studies would be needed to investigate the effect of cognitive interventions on  
352 the intracortical connectivity in pain patients.



## 353 METHODS

354 Twenty two healthy human subjects (18 female/4 male) with a mean age of  $27 \pm 5$  years (21 -  
355 37 years) participated in the experiment. Two of the female subjects were excluded as a  
356 result of insufficient data quality. All subjects gave written informed consent. The study was  
357 approved by the Medical Sciences Interdivisional Research Ethics Committee of the  
358 University of Oxford and conducted in conformity with the Declaration of Helsinki.

359 The experiment has been described in detail in our previous publication (14) and consisted  
360 of four conditions (see table 1) across 4 separate blocks, where each block comprised of 12  
361 trials from the same condition. In all conditions and trials the subjects received cold pain  
362 stimuli on the dorsum of their left hand delivered by a thermode (Pathway II; Medoc Ltd,  
363 Ramat Yishai, Israel). The subjects were prompted to rate pain intensity and pain  
364 unpleasantness. A numerical and a visual analogue scale (VAS), ranged between 0 - 100 in  
365 steps of 5 points, was used to assess the pain ratings. The endpoints of the scale were  
366 determined as no pain (0) and the maximum pain the subjects were willing to tolerate (100).  
367 Single trial ratings were recorded after each trial.

368 **Table 1: Conditions and Instructions.**

|                           |                                                                                                                                                                                                                                            |
|---------------------------|--------------------------------------------------------------------------------------------------------------------------------------------------------------------------------------------------------------------------------------------|
| (0) pain, non-modulated   | Concentrate only on the pain.                                                                                                                                                                                                              |
| (A) attentional shift     | Count backwards from 1000 (+x) by sevens.                                                                                                                                                                                                  |
| (B) imaginal strategy     | Imagine that you are in a safe and happy place that you know very well. That place has the colours you like and you hear the music you like. There are only people around that you want to have around you. You feel well and comfortable. |
| (C) cognitive reappraisal | Concentrate on the cool and tingling sensations in your arm and reinterpret these sensations as not painful.                                                                                                                               |

369 The thermode temperature for painful stimulation for each subject was determined in an  
370 extensive practise session one week prior to scanning and was individually adapted to a  
371 VAS score of 50. The 40s of painful stimulation were then preceded by a rest period of 10s  
372 at  $38^{\circ}\text{C}$  thermode temperature. The first 10s were not included in the analysis. The mean  
373 temperature of cold pain application across subjects was  $7^{\circ}\text{C}$  with a standard deviation of  
374  $3.6^{\circ}\text{C}$ . In order to avoid habituation effects, the thermode temperature during painful  
375 stimulation was oscillating with  $\frac{1}{8}$  Hz at  $\pm 3^{\circ}\text{C}$  (40,41).

376 *Data Acquisition.* Imaging data were acquired on a 7T Siemens MRI scanner. Each volume  
377 comprised 34 axial slices of 2 mm thickness and 2 × 2 mm in-plane resolution with 1mm gap  
378 between slices. The repetition time (TR) was 1.96s, the echo time (TE) was 25ms (flip angle  
379 90°), the field of view (FOV) was 220 × 220 mm, and the matrix size was 110 × 110 pixels. A  
380 T1-weighted structural image (isotropic 1mm<sup>3</sup> voxel) was acquired for the registration of the  
381 functional images to the MNI (Montreal Neurological Institute) template. Two sequences of  
382 diffusion tensor images (DTI) were recorded with L>>R and R>>L phase encoding direction.  
383 64 directions were recorded with a TR of 9.3s, a TE of 63ms, and an acceleration factor of 2.  
384 The length of the edge of the isotropic voxels was 1.2 mm.

385 *Image processing - preprocessing of functional connectivity data.* The data were  
386 preprocessed with FSL (42). The preprocessing of the *functional data* consisted of brain  
387 extraction, high-pass filtering with a frequency cutoff of 1/90 Hz, a spatial normalisation to  
388 the MNI template, a correction for head motion during scanning registered to the MNI  
389 template, and a spatial smoothing (6mm FWHM). The data were further semi-automatically  
390 cleaned of artefacts with independent component analysis (ICA) (43,44). The number of  
391 components had been set *a priori* to 200. Artefact-related components were removed from  
392 the data. The design matrix for painful stimulation, including the temporal derivative, were  
393 then regressed out from the data in Matlab (The Mathworks, USA).

394 *Image processing - preprocessing of structural connectivity data.* Preprocessing of DTI data  
395 was performed using FSL. FSL preprocessing included (i) correcting susceptibility induced  
396 distortions (“topup”), (ii) skull stripping (“bet”), (iii) corrections for eddy currents and head  
397 motion (“eddy”), and (iiii) determining the strength of structural connectivity between cortical  
398 regions (“bedpostx” and “probtrackx”) defined by the Glasser atlas.

399 *Image processing - extraction of regions of interest data.* The time series of functional  
400 volumes were converted to MNI space and subsequently projected to surface space by  
401 using the “Connectome Workbench” package. We used a template that allowed to project  
402 from 3D standard MNI space to 2D surface space. Regions of interest (ROIs) were defined  
403 by subdividing the cortical surface into 180 regions per hemisphere (13). Six further regions  
404 that are important for the processing of pain, such as the PAG, the thalamus and the  
405 amygdala, were also included. Latter ROIs were based on the Oxford Atlas, implemented in  
406 FSL.

407 *Image processing - computation of single trial functional connectivity scores.* The time  
408 courses for all voxels of cortical activity for a specific region of the Glasser Atlas, e.g. the  
409 middle insula, were extracted. We computed principal component analyses (PCA) separately  
410 for each ROI and subject and selected the first component (Matlab, The MathWorks, Inc.,  
411 USA). The plateau phase of the last ~30s of painful stimulation (15 data points) has been  
412 extracted from each region and trial for each subject and condition. Outliers were removed  
413 from the data. These 15 data points determined the connectivity for a brain region for a given  
414 trial. Correlation coefficients were computed for each trial and for each ROI with the  
415 remaining 370 ROIs. The single trial correlation coefficients were Fisher Z-transformed and  
416 fed into group-level statistical analysis.

417 *Image processing - structural connectivity data.* DTI data were also analysed in FSL. The  
418 processing steps included a median filter, a correction for susceptibility distortions, and fibre  
419 tracking from the same aforementioned brain regions (Glasser parcellation - see above).

420 *Statistical modelling:* The statistical analysis for the connectivity between cortical regions has  
421 been performed in Matlab. To explore the relationship of fluctuating cortical connectivity and  
422 the variable pain experience, we computed linear mixed effects models (LMEs) that related  
423 the single trial correlation coefficients between two brain regions to the pain intensity scores  
424 (14,45). Each condition in the model included the data for the respective intervention plus  
425 the trials of the unmodulated pain condition (for more details regarding the statistical  
426 analyses see (14). The model is expressed in Wilkinson notation  
427 <https://www.mathworks.com/help/stats/wilkinson-notation.html>). Statistical thresholds were  
428 determined by PALM software (38).

429 
$$\text{painrating} \sim \text{func\_conn} + (1 | \text{subject})$$

430 We further analysed whether individual differences in functional connectivity could be  
431 explained by individual structural characteristics of the brain. In other words, we analysed  
432 whether the functional connectivity that leads to a single subject's successful pain  
433 attenuation is facilitated by that subject's high number of fibre tracts. In a similar vein, a poor  
434 functional connectivity that is not able to contribute to pain attenuation might be caused by a  
435 low number of fibre tracts.

436 
$$\text{painrating} \sim \text{func\_conn}:\text{struc\_conn} + (1 | \text{subject})$$

437 We considered only functional connections with a t-value  $>2$  as potentially modulated by  
438 structural connections.

## 439 REFERENCES

- 440 (1) Tracey I, Mantyh PW. The Cerebral Signature for Pain Perception and Its Modulation.  
441 *Neuron* 2007 August;55(3):377-391.
- 442 (2) Wiech K, Ploner M, Tracey I. Neurocognitive aspects of pain perception. *Trends Cogn*  
443 *Sci (Regul Ed )* 2008 August;12(8):306-313.
- 444 (3) Wiech K, Tracey I. Pain, decisions, and actions: a motivational perspective. *Frontiers in*  
445 *neuroscience* 2013 January;7:46.
- 446 (4) Sprenger C, Finsterbusch J, Büchel C. Spinal cord-midbrain functional connectivity is  
447 related to perceived pain intensity: a combined spino-cortical fMRI study. *J Neurosci* 2015  
448 March 11,;35(10):4248-4257.
- 449 (5) Villemure C, Bushnell MC. Mood influences supraspinal pain processing separately from  
450 attention. *J Neurosci* 2009 Jan 21,;29(3):705-715.
- 451 (6) Ploner M, Lee MC, Wiech K, Bingel U, Tracey I. Flexible cerebral connectivity patterns  
452 subserve contextual modulations of pain. *Cereb Cortex* 2011 March;21(3):719-726.
- 453 (7) Sprenger C, Eichler I, Eichler L, Zöllner C, Büchel C. Altered Signaling in the Descending  
454 Pain-modulatory System after Short-Term Infusion of the  $\mu$ -Opioid Agonist Remifentanyl. *J*  
455 *Neurosci* 2018 03 07,;38(10):2454-2470.
- 456 (8) Ploner M, Lee MC, Wiech K, Bingel U, Tracey I. Prestimulus functional connectivity  
457 determines pain perception in humans. *Proc Natl Acad Sci U S A* 2010 January  
458 5,;107(1):355-360.
- 459 (9) Eippert F, Bingel U, Schoell ED, Yacubian J, Klingler R, Lorenz J, et al. Activation of the  
460 opioidergic descending pain control system underlies placebo analgesia. *Neuron* 2009  
461 August;63(4):533-43.
- 462 (10) Sprenger C, Eippert F, Finsterbusch J, Bingel U, Rose M, Büchel C. Attention  
463 modulates spinal cord responses to pain. *Curr Biol* 2012 Jun 5,;22(11):1019-1022.
- 464 (11) Tracey I, Ploghaus A, Gati JS, Clare S, Smith S, Menon RS, et al. Imaging attentional  
465 modulation of pain in the periaqueductal gray in humans. *J Neurosci* 2002 April;22(7):2748-  
466 2752.
- 467 (12) Lin RL, Douaud G, Filippini N, Okell TW, Stagg CJ, Tracey I. Structural Connectivity  
468 Variances Underlie Functional and Behavioral Changes During Pain Relief Induced by  
469 Neuromodulation. *Sci Rep* 2017 Feb 02,;7:41603.
- 470 (13) Glasser MF, Coalson TS, Robinson EC, Hacker CD, Harwell J, Yacoub E, et al. A multi-  
471 modal parcellation of human cerebral cortex. *Nature* 2016 Aug 11,;536(7615):171-178.
- 472 (14) Schulz E, Stankewitz A, Witkovský V, Winkler AM, Tracey I. Strategy-dependent  
473 modulation of cortical pain circuits for the attenuation of pain. *Cortex* 2019 Jan 04,;113:255-  
474 266.
- 475 (15) Devine DP, Spanos NP. Effectiveness of maximally different cognitive strategies and  
476 expectancy in attenuation of reported pain. *J Pers Soc Psychol* 1990 April;58(4):672-678.
- 477 (16) Tracey I. Imaging pain. *Br J Anaesth* 2008;101(1):32-39.
- 478 (17) Thiaucourt M, Shabes P, Schloss N, Sack M, Baumgärtner U, Schmahl C, et al.  
479 Posterior Insular GABA Levels Inversely Correlate with the Intensity of Experimental  
480 Mechanical Pain in Healthy Subjects. *Neuroscience* 2018 09 01,;387:116-122.
- 481 (18) Watson CJ. Insular balance of glutamatergic and GABAergic signaling modulates pain  
482 processing. *Pain* 2016 10;157(10):2194-2207.
- 483 (19) Johansen-Berg H, Matthews PM. Attention to movement modulates activity in sensori-  
484 motor areas, including primary motor cortex. *Exp Brain Res* 2002 Jan;142(1):13-24.
- 485 (20) Mars RB, Sallet J, Schüffelgen U, Jbabdi S, Toni I, Rushworth MFS. Connectivity-based  
486 subdivisions of the human right "temporoparietal junction area": evidence for different areas  
487 participating in different cortical networks. *Cereb Cortex* 2012 Aug;22(8):1894-1903.
- 488 (21) Kucyi A, Hodaie M, Davis KD. Lateralization in intrinsic functional connectivity of the  
489 temporoparietal junction with salience- and attention-related brain networks. *J Neurophysiol*  
490 2012 Dec;108(12):3382-3392.
- 491 (22) Amalric M, Dehaene S. Origins of the brain networks for advanced mathematics in

- 492 expert mathematicians. *Proc Natl Acad Sci U S A* 2016 May 03;113(18):4909-4917.  
493 (23) Xie F, Xu L, Long Z, Yao L, Wu X. Functional connectivity alteration after real-time fMRI  
494 motor imagery training through self-regulation of activities of the right premotor cortex. *BMC*  
495 *Neurosci* 2015 May 01;16:29.  
496 (24) Szameitat AJ, Shen S, Sterr A. Motor imagery of complex everyday movements. An  
497 fMRI study. *Neuroimage* 2007 Jan 15;34(2):702-713.  
498 (25) Bingel U, Schoell E, Herken W, Buchel C, May A. Habituation to painful stimulation  
499 involves the antinociceptive system. *Pain* 2007;131(1-2):21-30.  
500 (26) Schultz H, Sommer T, Peters J. The Role of the Human Entorhinal Cortex in a  
501 Representational Account of Memory. *Front Hum Neurosci* 2015;9:628.  
502 (27) Braskie MN, Small GW, Bookheimer SY. Entorhinal cortex structure and functional MRI  
503 response during an associative verbal memory task. *Hum Brain Mapp* 2009  
504 Dec;30(12):3981-3992.  
505 (28) Dalton MA, Maguire EA. The pre/parasubiculum: a hippocampal hub for scene-based  
506 cognition? *Curr Opin Behav Sci* 2017 Oct;17:34-40.  
507 (29) Hodgetts CJ, Voets NL, Thomas AG, Clare S, Lawrence AD, Graham KS. Ultra-High-  
508 Field fMRI Reveals a Role for the Subiculum in Scene Perceptual Discrimination. *J Neurosci*  
509 2017 03 22;37(12):3150-3159.  
510 (30) Montchal ME, Reagh ZM, Yassa MA. Precise temporal memories are supported by the  
511 lateral entorhinal cortex in humans. *Nat Neurosci* 2019 Feb;22(2):284-288.  
512 (31) Fattori P, Kutz DF, Breveglieri R, Marzocchi N, Galletti C. Spatial tuning of reaching  
513 activity in the medial parieto-occipital cortex (area V6A) of macaque monkey. *Eur J*  
514 *Neurosci* 2005 Aug;22(4):956-972.  
515 (32) Hadjidimitrakis K, Bertozzi F, Breveglieri R, Fattori P, Galletti C. Body-centered, mixed,  
516 but not hand-centered coding of visual targets in the medial posterior parietal cortex during  
517 reaches in 3D space. *Cereb Cortex* 2014 Dec;24(12):3209-3220.  
518 (33) Bantick SJ, Wise RG, Ploghaus A, Clare S, Smith SM, Tracey I. Imaging how attention  
519 modulates pain in humans using functional MRI. *Brain* 2002 February;125:310-319.  
520 (34) Hauck M, Lorenz J, Engel AK. Attention to painful stimulation enhances gamma-band  
521 activity and synchronization in human sensorimotor cortex. *J Neurosci* 2007  
522 August;27(35):9270-9277.  
523 (35) Peyron R, Garcia-Larrea L, Gregoire MC, Costes N, Convers P, Lavenne F, et al.  
524 Haemodynamic brain responses to acute pain in humans: sensory and attentional networks.  
525 *Brain* 1999 September;122 ( Pt 9):1765-1780.  
526 (36) Buhle JT, Silvers JA, Wager TD, Lopez R, Onyemekwu C, Kober H, et al. Cognitive  
527 Reappraisal of Emotion: A Meta-Analysis of Human Neuroimaging Studies. *Cerebral cortex*  
528 (New York, N.Y.: 1991) 2013 June;24(11):2981-2990.  
529 (37) Tracey I. Getting the pain you expect: mechanisms of placebo, nocebo and reappraisal  
530 effects in humans. *Nat Med* 2010 November;16(11):1277-83.  
531 (38) Winkler AM, Ridgway GR, Webster MA, Smith SM, Nichols TE. Permutation inference  
532 for the general linear model. *Neuroimage* 2014 May 15;92:381-397.  
533 (39) Wilcox CE, Mayer AR, Teshiba TM, Ling J, Smith BW, Wilcox GL, et al. The Subjective  
534 Experience of Pain: An FMRI Study of Percept-Related Models and Functional Connectivity.  
535 *Pain Med* 2015 Nov;16(11):2121-2133.  
536 (40) Lautenbacher S, Roscher S, Strian F. Tonic pain evoked by pulsating heat: temporal  
537 summation mechanisms and perceptual qualities. *Somatosens Mot Res* 1995;12(1):59-70.  
538 (41) Stankewitz a, Schulz E, May A. Neuronal correlates of impaired habituation in response  
539 to repeated trigemino-nociceptive but not to olfactory input in migraineurs: an fMRI study.  
540 *Cephalalgia* 2013;33(4):256-265.  
541 (42) Jenkinson M, Beckmann CF, Behrens TEJ, Woolrich MW, Smith SM. FSL. *Neuroimage*  
542 2012 Aug 15;62(2):782-790.  
543 (43) Salimi-Khorshidi G, Douaud G, Beckmann CF, Glasser MF, Griffanti L, Smith SM.  
544 Automatic denoising of functional MRI data: combining independent component analysis and  
545 hierarchical fusion of classifiers. *Neuroimage* 2014 Apr 15;90:449-468.  
546 (44) Griffanti L, Salimi-Khorshidi G, Beckmann CF, Auerbach EJ, Douaud G, Sexton CE, et

547 al. ICA-based artefact removal and accelerated fMRI acquisition for improved resting state  
548 network imaging. *Neuroimage* 2014 Jul 15,;95:232-247.  
549 (45) Schulz E, May ES, Postorino M, Tiemann L, Nickel MM, Witkovsky V, et al. Prefrontal  
550 Gamma Oscillations Encode Tonic Pain in Humans. *Cereb Cortex* 2015 Nov;25(11):4407-  
551 4414.

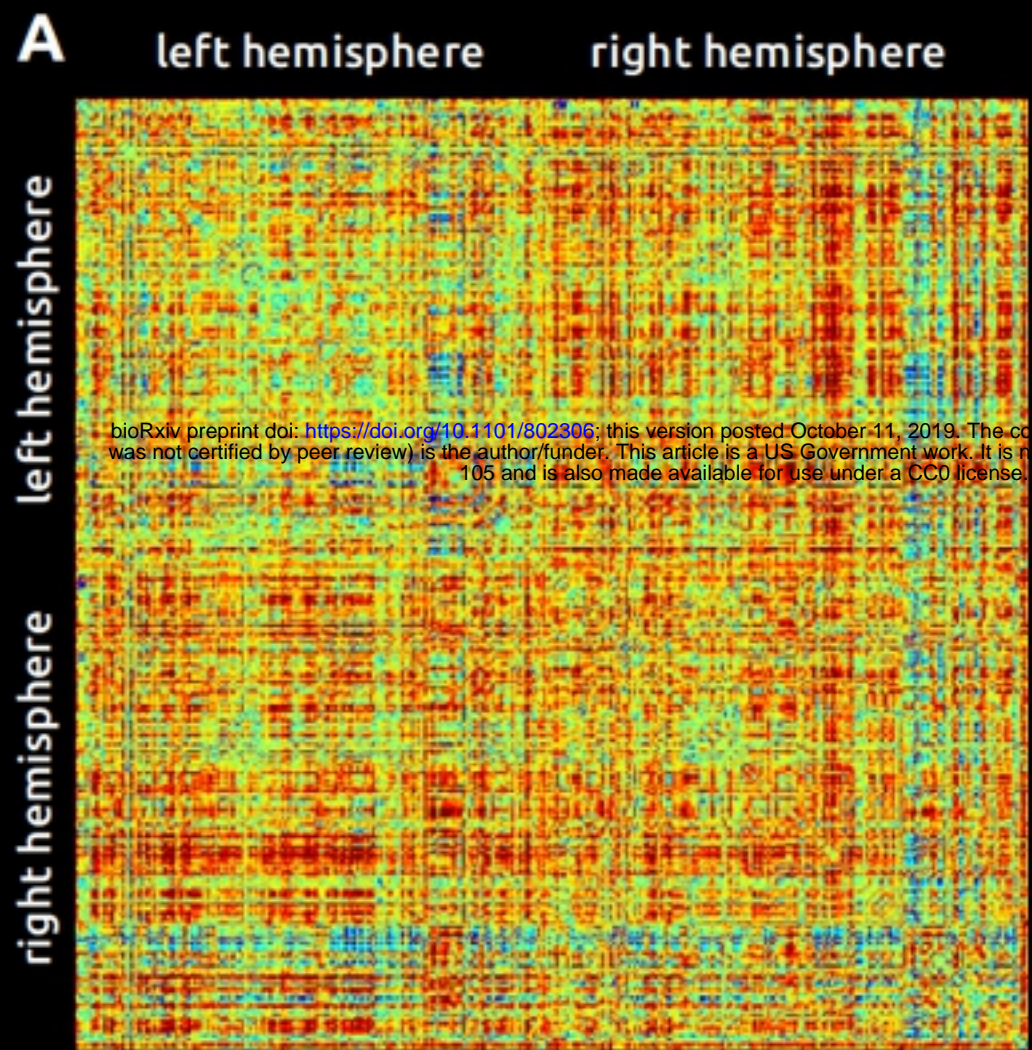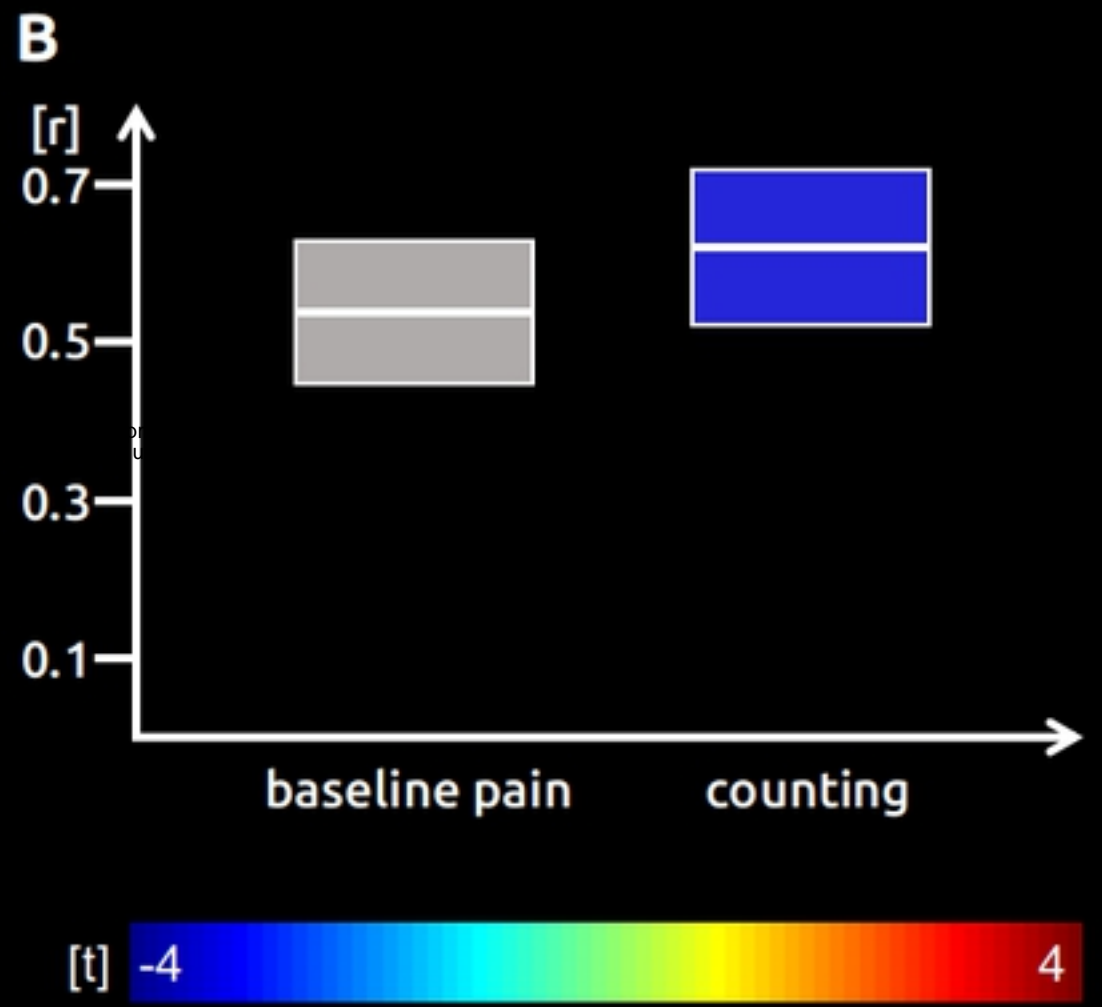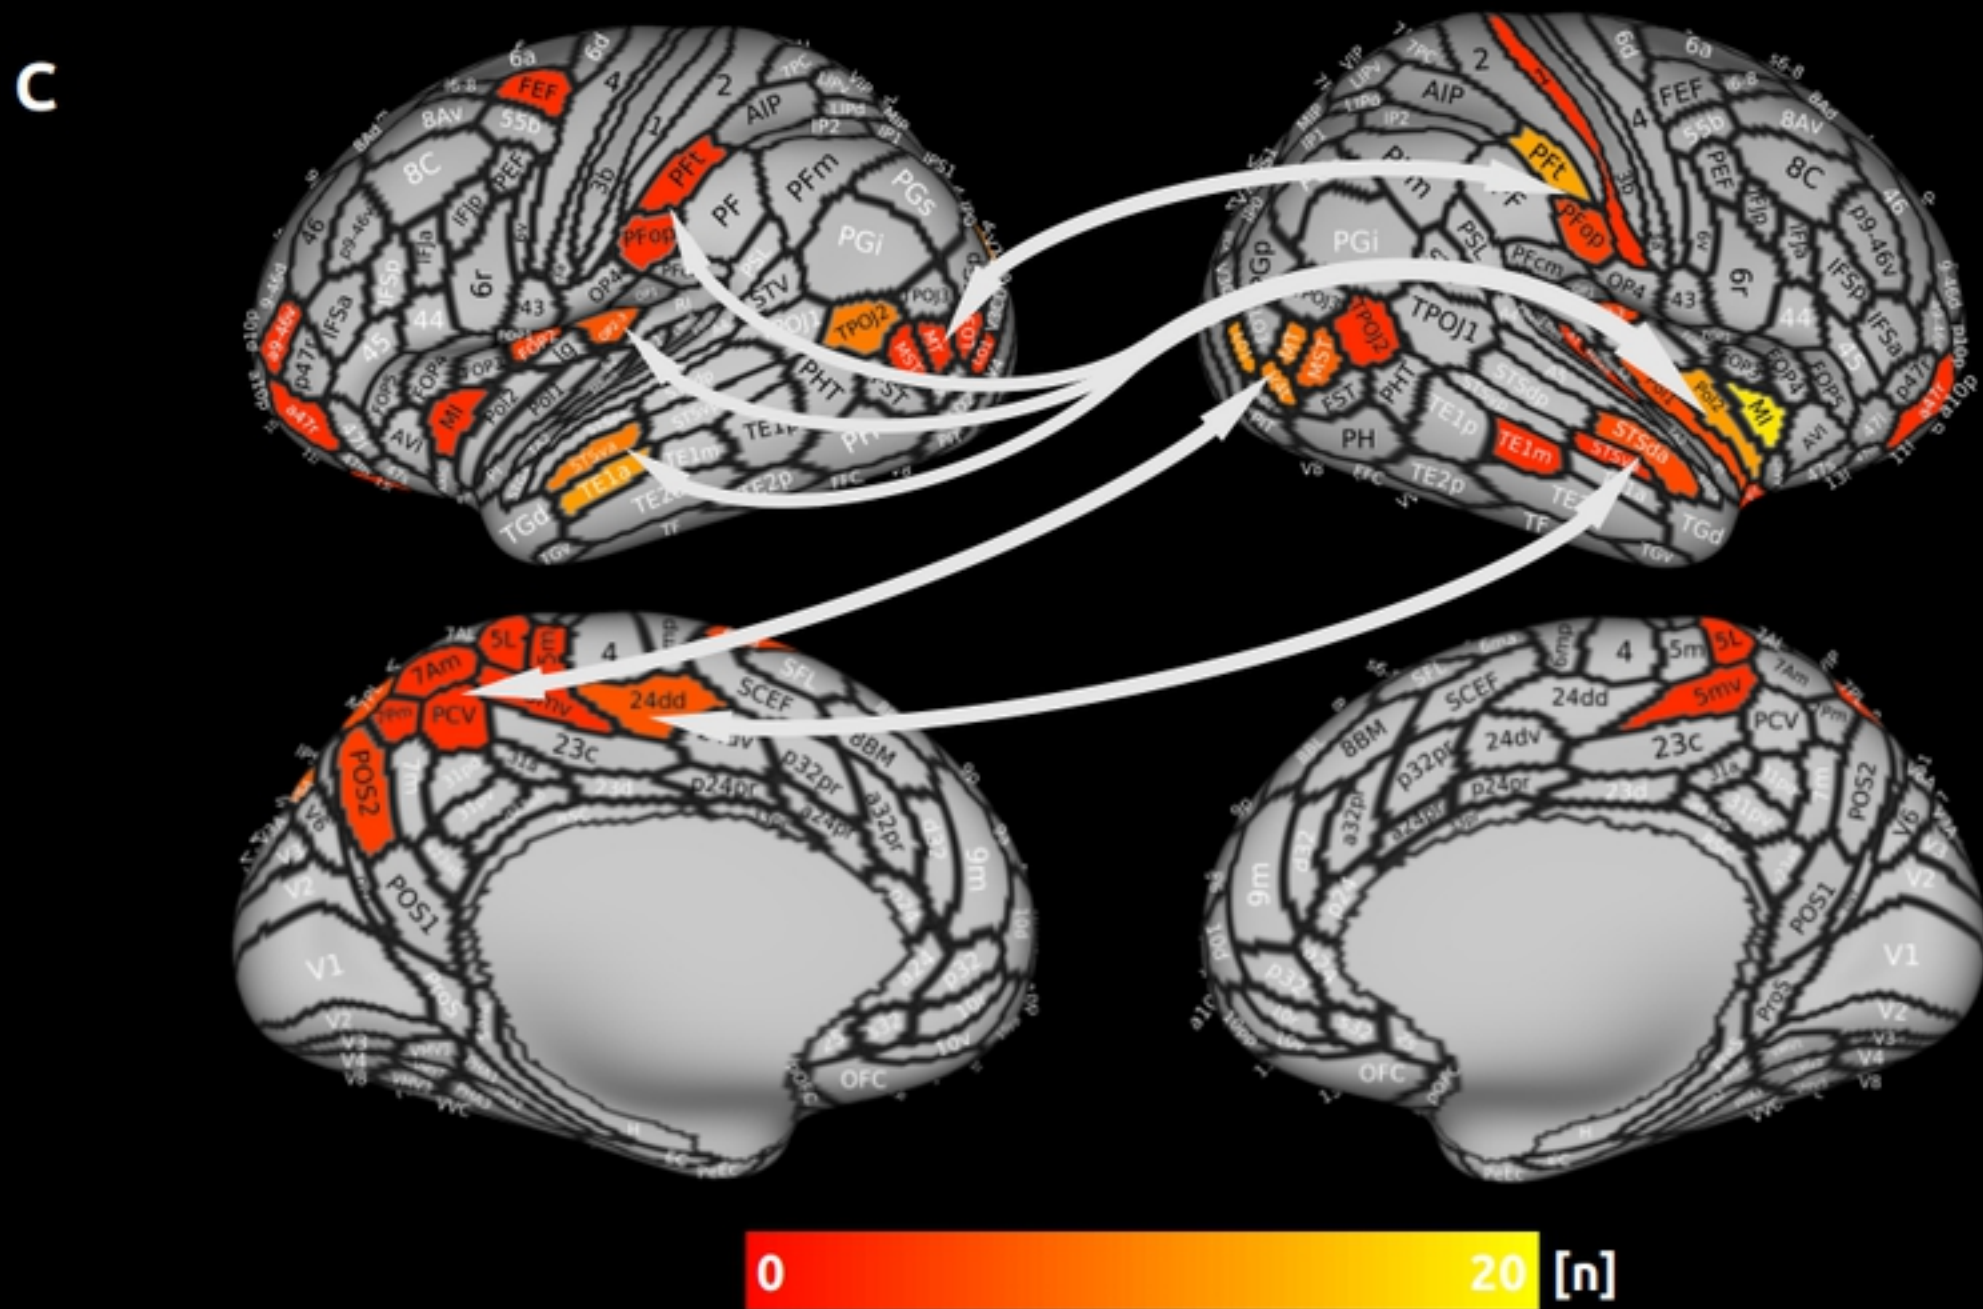

Figure 1



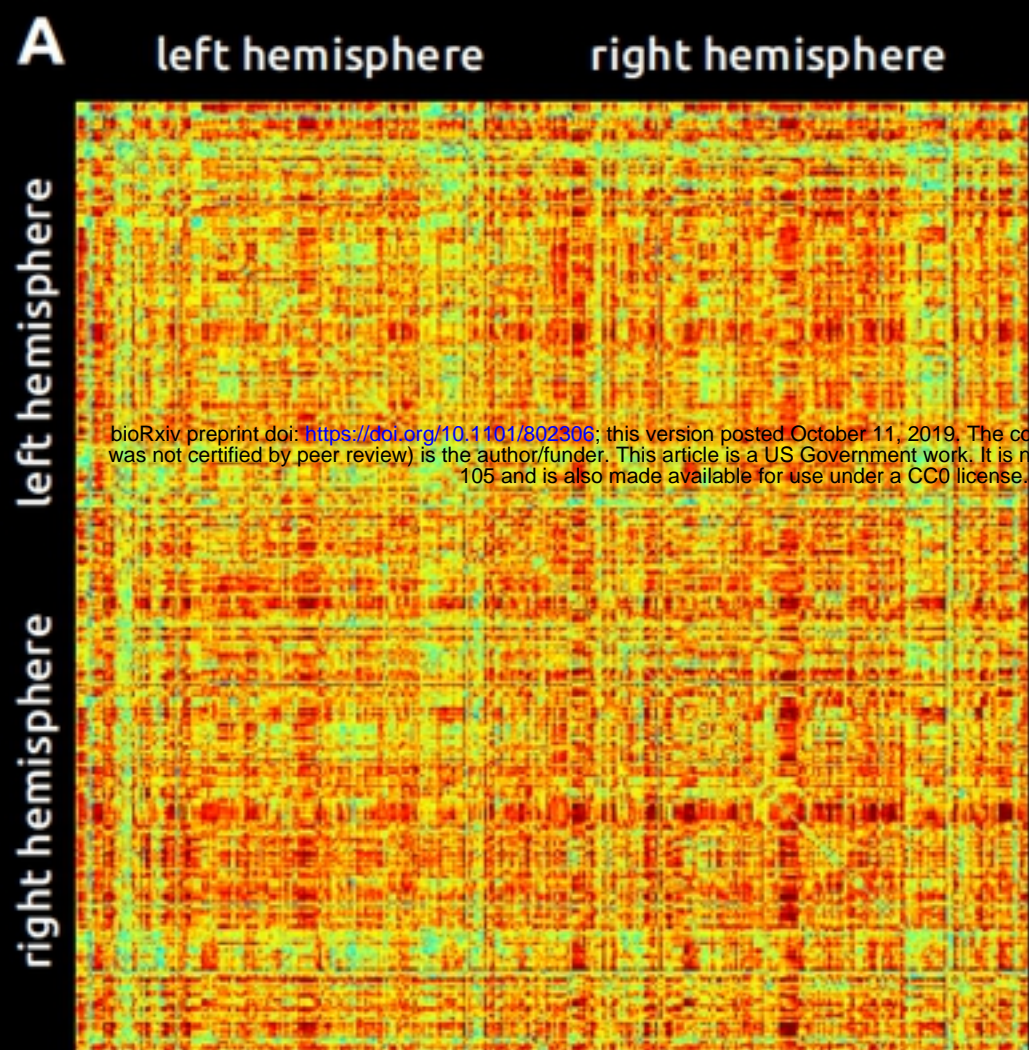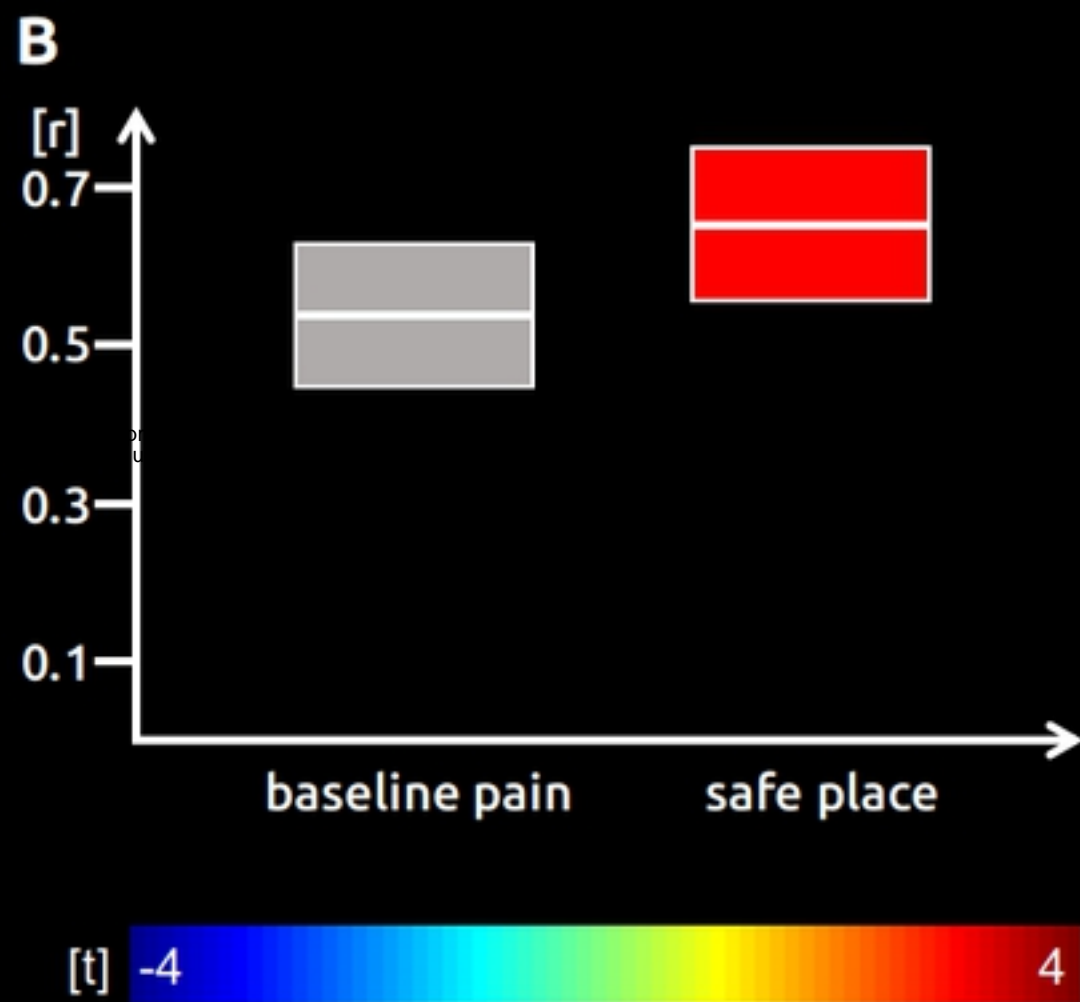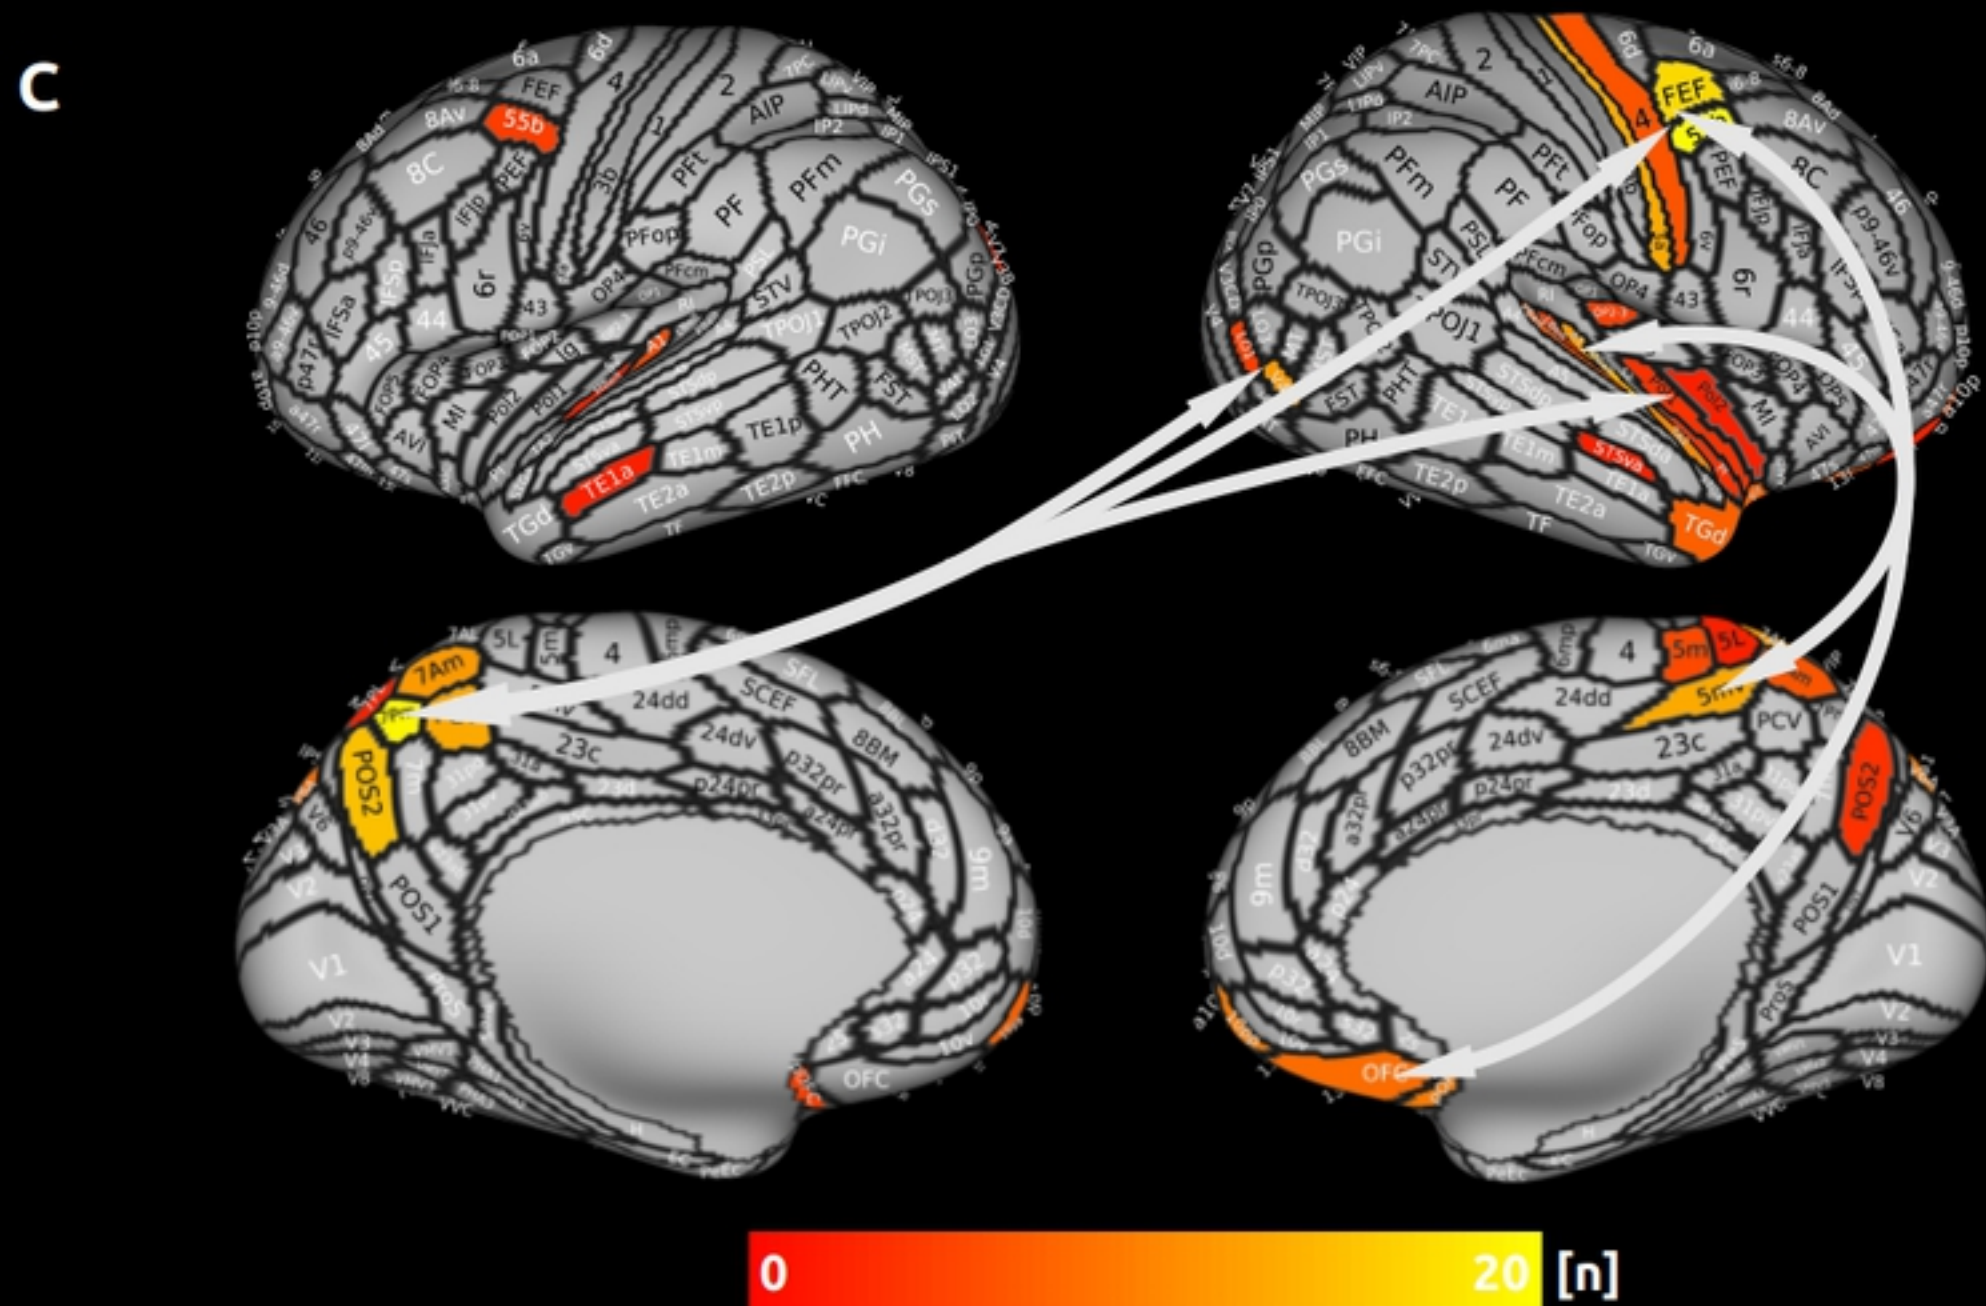

Figure 2

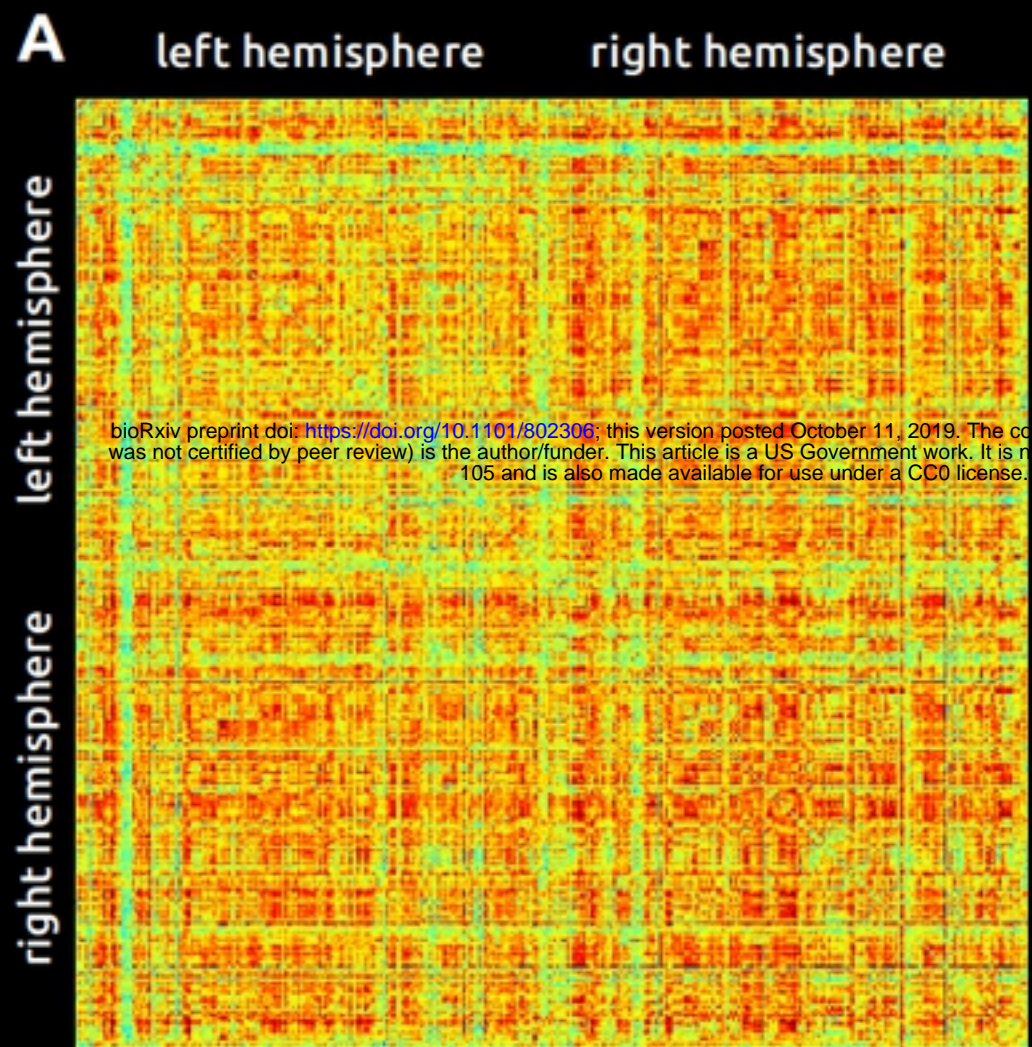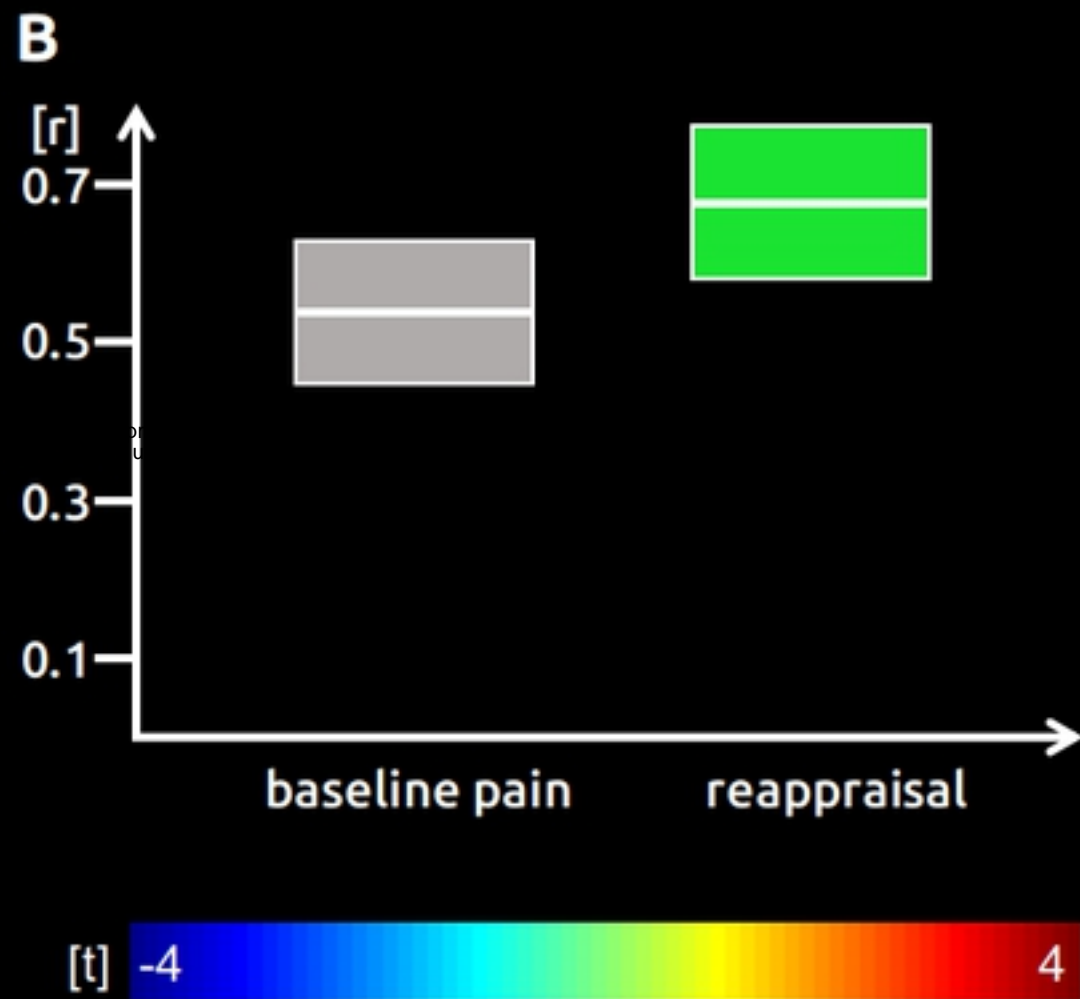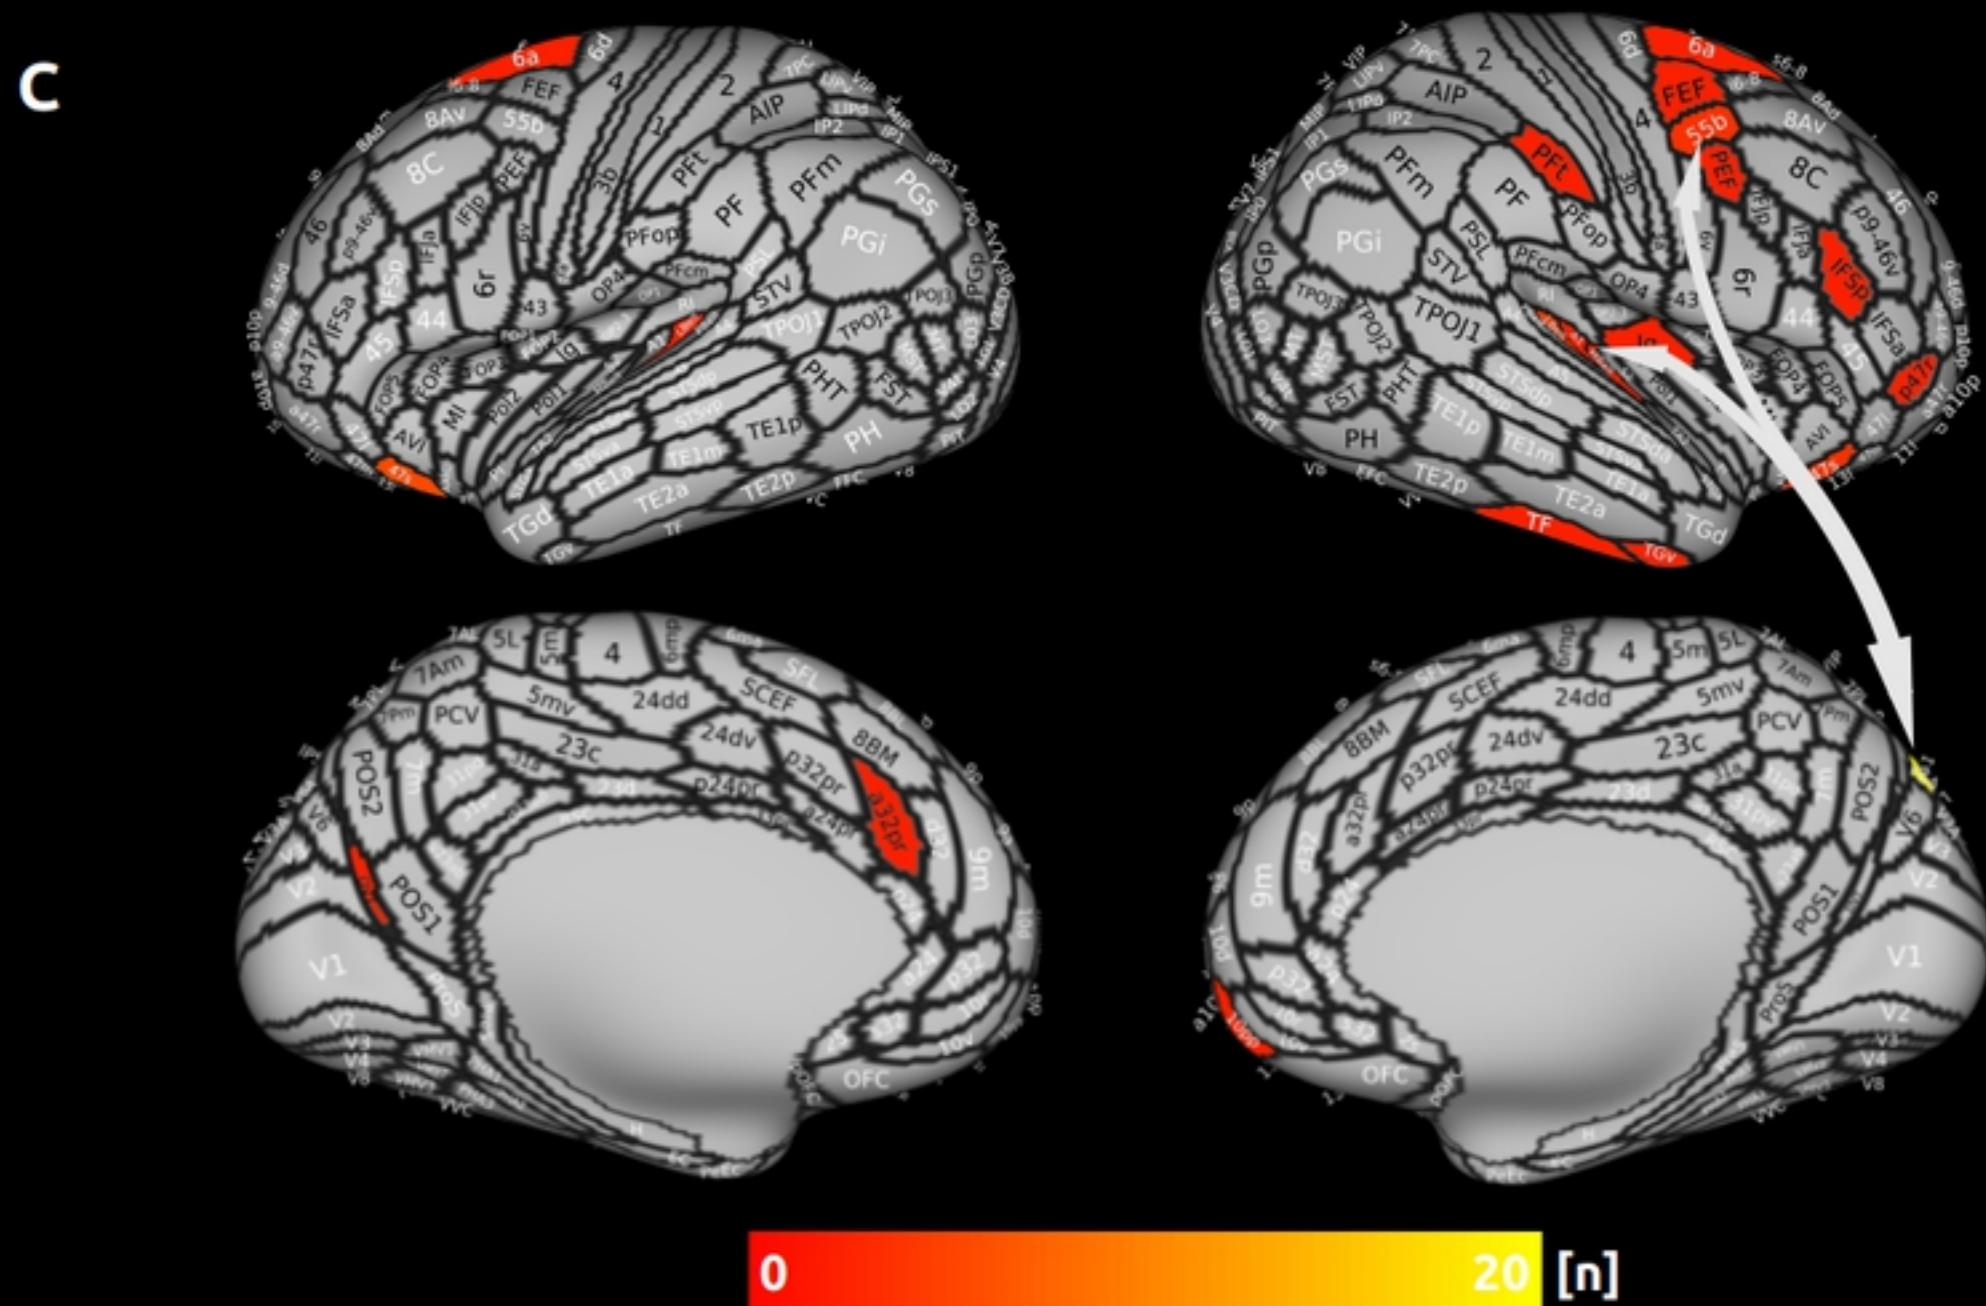

Figure 3
